# Supplementary material
Source: publisher figshare collection journal article supplement (https://springernature.figshare.com/ndownloader/files/18540227)
Supplement: Supplementary file [file 18540227]

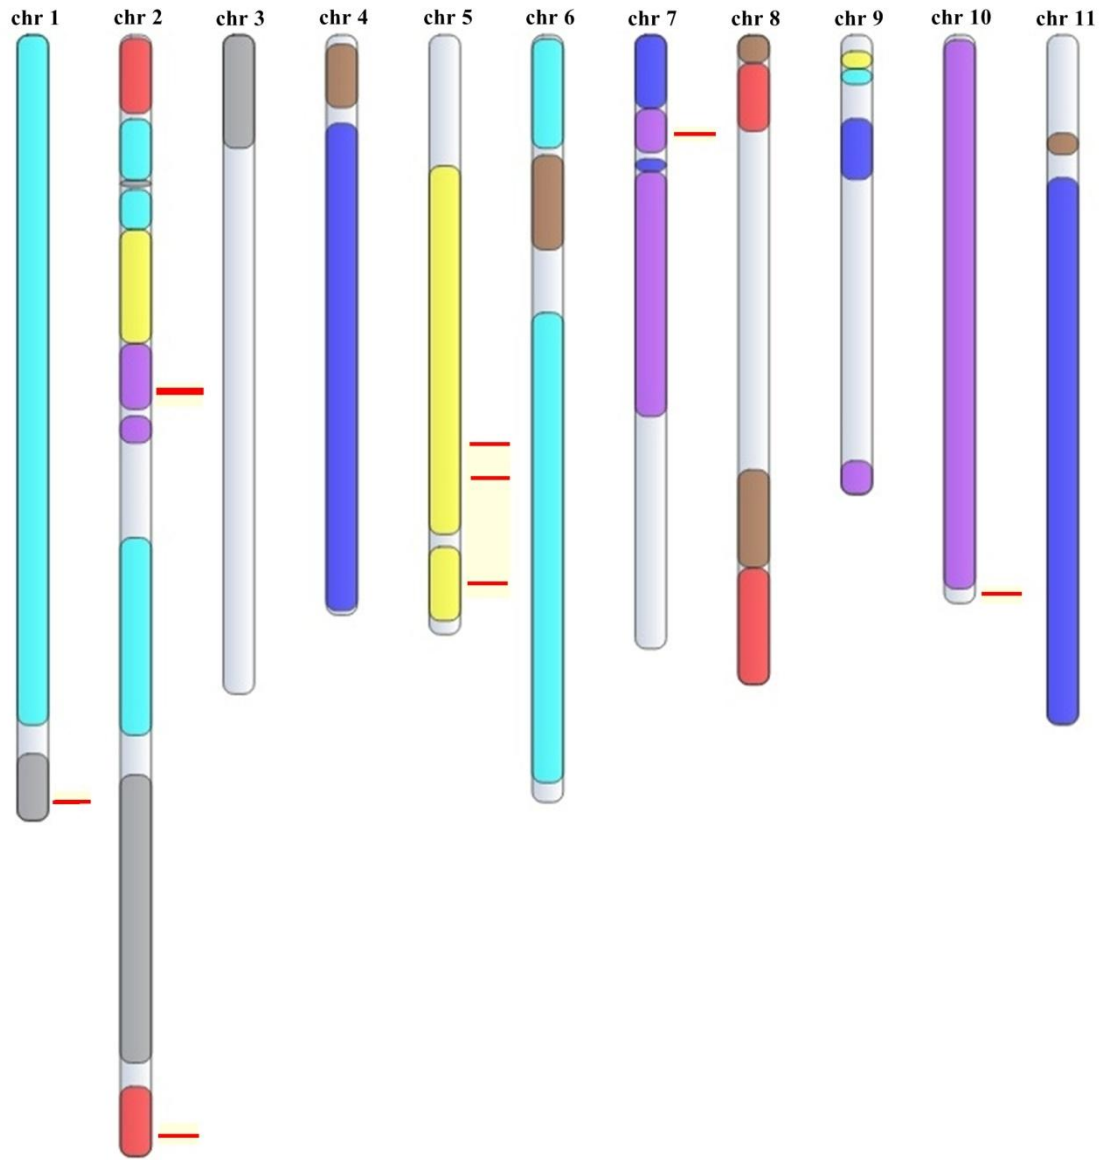

**Supplementary Figure S1.** Gene distribution of *CcGH3* members on *C. canephora* chromosomes using the option "locus search" in the Coffe Genome Hub website. The colors within each chromosome indicate ancestral blocks corresponding to the 7 core eudicot chromosomes (DENOUEE et al., 2014). Red lines stand for the position of each *CcGH3* over chromosomes. The most *CcGH3* members are not presented in any chromosome, so they were allocated in chromosome 0 (not available). The genes are distributed as follow into each chromosome (chr): chr1: *CcGH3.9*; chr2: *CcGH3.10*, *CcGH3.11* and *CcGH3.12*; chr5: *CcGH3.13*, *CcGH3.14* and *CcGH3.15*; chr7: *CcGH3.16*; chr10: *CcGH3.17*.
